# Supplementary material for: Exploring the Impact of Terminators on Transgene Expression in Chlamydomonas reinhardtii with a Synthetic Biology Approach
Source: MDPI journal article supplement (doi:10.3390/life11090964), 2021-09-14
Supplement: s1 [file s1]

Supplementary Materials

# Exploring the impact of terminators on transgene expression in *Chlamydomonas reinhardtii* with a synthetic biology approach.

Katrin Geisler <sup>1</sup>, Mark A. Scaife <sup>1,2</sup>, Paweł M. Mordaka <sup>1</sup>, Andre Holzer <sup>1</sup>, Eleanor V. Tomsett <sup>1</sup>, Payam Mehrshahi <sup>1</sup>, Gonzalo I. Mendoza Ochoa <sup>1</sup> and Alison G. Smith <sup>1,\*</sup>

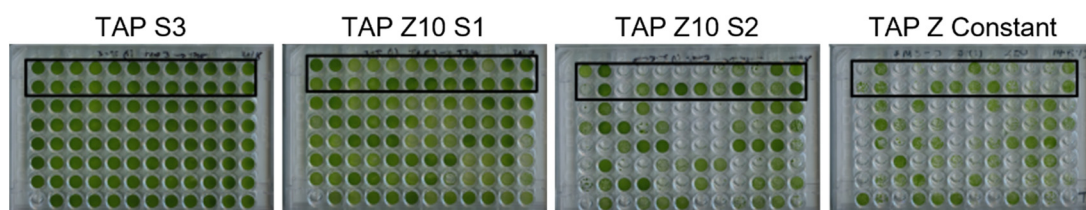

**Figure S1.** Comparison of no selection versus selection workflow. Example images depict growth in TAP after 3 subcultures (TAP S3), the subsequent transfer from TAP S3 into TAP containing zeocin (TAP Z10 S1), the second subculture in the presence of zeocin (TAP Z10 S2) and for comparison the replica plates that have been cultured continuously in the presence of zeocin (TAP Z10 constant). All images were taken on day 7 of growth. Black boxes show cell lines analyzed further for GFP expression.

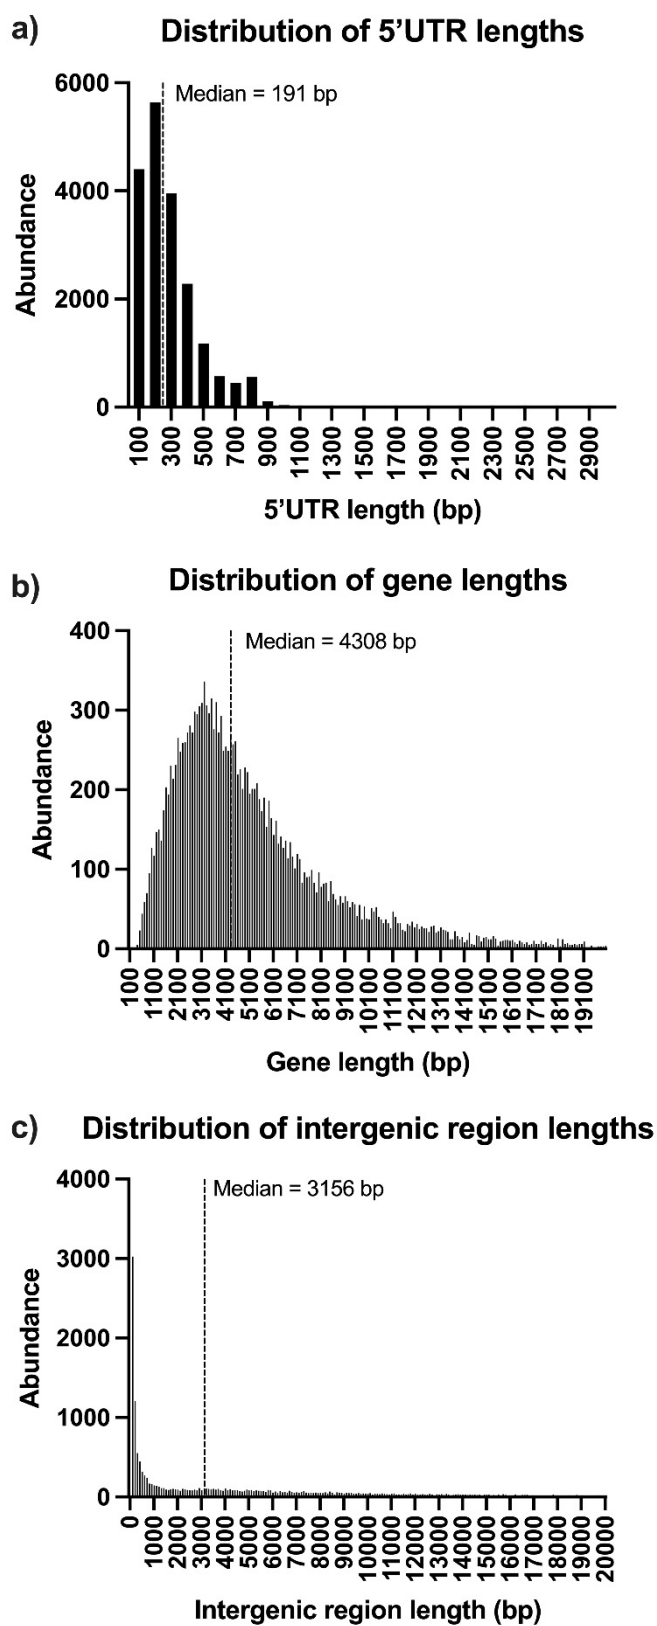

**Figure S2.** Analysis of genomic features in *C. reinhardtii*. (a) Distribution of 5' UTR lengths. (b) Distribution of gene lengths. (c) Distribution of the length between intergenic regions. All lengths are based on annotations from the *C. reinhardtii* genome v5.6. Calculated median sizes of genomic features are shown.

**Table S1.** Primers used for Gibson assembly and DNA part generation.

| Part Name | Primer Name    | Primer Sequence (5'-3')                                                                                                                          |
|-----------|----------------|--------------------------------------------------------------------------------------------------------------------------------------------------|
| GFP-3'UTR | Rbcs2(B)-Ble F | GAGAAAGTCACTCAACATCTTAAATGGCCAAGCTGACCAGCGCCGTTTC                                                                                                |
| GFP-RPL31 | GFP-L31 R      | CCACAGAAAGAGTTACACACTTGC GGCGTATGGCTTACTTGTACAGCTCGTCCATGCCGT                                                                                    |
| GFP-RPS29 | GFP-RPS29 R    | ACGGCATGGACGAGCTGTACAAGTAAAATGCCCCGAATGTTGGGTATCTAGCTCACACG<br>CAGTTTGTAAAGGTGCTGAGGCGTTG                                                        |
| GFP-RPL11 | GFP-RPL11 R    | GGTCAGGACTTGTTACACAGATGGGGTGGCATCTGTCATCACCAGCCTCTTGTGGCCGCT<br>TTACTTGTACAGCTCGTCCATGCCGT                                                       |
| GFP-RBCS2 | GFP-RBCS2 R    | GCTCAGATCAACGAGCGCCTCCATTTACTTGTACAGCTCGTCCATGCCGT                                                                                               |
| GFP-PSAD  | GFP-PSAD R     | GGTACAGGCGGTCCAGCTGCTGCCTTACTTGTACAGCTCGTCCATGCCGT                                                                                               |
| GFP-THI4  | GFP-THI4 R     | GCAGCCCAGTAGGTTCTGAGCGCGCTTACTTGTACAGCTCGTCCATGCCGT                                                                                              |
| GFP-METE  | GFP-METE R     | TCAGCATAAATCAAGGCAGGCAGCTTACTTGTACAGCTCGTCCATGCCGT                                                                                               |
| GFP-CA1   | GFP-CA1 R      | TAGCGTGACTAACTACTGGGAAGTTTACTTGTACAGCTCGTCCATGCCGT                                                                                               |
| GFP-NIT1  | GFP-NIT1 R     | ACCGTGGCCACAATCTCTAGCGATTTACTTGTACAGCTCGTCCATGCCGT                                                                                               |
| GFP-noUTR | GFP-noUTR R    | GTGCGTCGGGTGATGCTGCCAACTTACTGATTTAGTTACTTGTACAGCTCGTCCATGCCGT                                                                                    |
| noUTR     | GFP-noUTR F    | ACGGCATGGACGAGCTGTACAAGTAACTAAATCAGTAAGTTGGCAG                                                                                                   |
| RBCS2     | GFP-RBCS2 F    | ACGGCATGGACGAGCTGTACAAGTAAATGGAGGCGCTCGTTGATCTGAGC                                                                                               |
| RBCS2     | RBCS2-BADCmR   | GTGATGCTGCCAACTTACTGATTTAGCGCTTCAAATACGCCCAGCCCCGCC                                                                                              |
| PSAD      | GFP-PSAD F     | ACGGCATGGACGAGCTGTACAAGTAAAGGCAGCAGCTGGACCGCCTGTACC                                                                                              |
| PSAD      | PSAD-BADCmR    | GTGATGCTGCCAACTTACTGATTTAGCACGGCAAACCTCTCACATGGCCTG                                                                                              |
| THI4      | GFP-THI4 F     | ACGGCATGGACGAGCTGTACAAGTAAAGCGCGCTCAGAACCTACTGGGCTGC                                                                                             |
| THI4      | THI4-BADCmR    | GTGATGCTGCCAACTTACTGATTTAGTCTCAACTCCAAATTGTTACATGA                                                                                               |
| METE      | GFP-METE F     | ACGGCATGGACGAGCTGTACAAGTAAAGCTGCCTGCCTTGATTTATGCTGA                                                                                              |
| METE      | METE-BADCmR    | GTGATGCTGCCAACTTACTGATTTAGACGTCACACCTTGCTACCCTACAG                                                                                               |
| CA1       | GFP-CA1 F      | ACGGCATGGACGAGCTGTACAAGTAAACTTCCCAGTAGTTAGTCACGCTA                                                                                               |
| CA1       | CA1-BADCmR     | GTGATGCTGCCAACTTACTGATTTAGTCCATGGGCATCTTACATGTGCTA                                                                                               |
| NIT1      | GFP-NIT1 F     | ACGGCATGGACGAGCTGTACAAGTAAATCGCTAGAGATTGTGGCCACGGT                                                                                               |
| NIT1      | NIT1-BADCmR    | GTGATGCTGCCAACTTACTGATTTAGCGCTTGCTTAATTTACAACGTGC                                                                                                |
| RPL31-pUC | L31-BADCmF     | GCAAGTGTGTAACCTTTCTGTGGCTAAATCAGTAAGTTGGCAGCATCAC<br>AATGCCCCGAATGTTGGGTATCTAGCTCACACGGCAGTTTGTAAAGGTGCTGAGGCGTT-<br>GCTAAATCAGTAAGTTGGCAGCATCAC |
| RPS29-pUC | RPS29-BADCmF   | AGCGGCCACAAGAGGCTGGTGATGACAGATGCCACCCCATCTGTG-<br>TAACAAGTCCTGACCCTAAATCAGTAAGTTGGCAGCATCAC                                                      |
| RPL11-pUC | RPL11-BADCmF   | GGCGGGCTGGGCGTATTTGAAGCGCTAAATCAGTAAGTTGGCAGCATCAC                                                                                               |
| RBCS2-pUC |                | CAGGCCATGTGAGAGTTTGCCGTGCTAAATCAGTAAGTTGGCAGCATCAC                                                                                               |
| PSAD-pUC  | PSAD-BADCmF    | TCATGTAACAATTTGGAGTTGAGACTAAATCAGTAAGTTGGCAGCATCAC                                                                                               |
| THI4-pUC  | THI4-BADCmF    | CTGTAGGGTAGCAAGGTGTGACGCTCTAAATCAGTAAGTTGGCAGCATCAC                                                                                              |
| METE-pUC  | METE-BADCmF    | TACGACATGTAAGATGCCCATGGACTAAATCAGTAAGTTGGCAGCATCAC                                                                                               |
| CA1-pUC   | CA1-BADCmF     | GCACAGTTGTAAATTAAGCAAGCGCTAAATCAGTAAGTTGGCAGCATCAC                                                                                               |
| NIT1-pUC  | NIT1-BADCmF    | CACCAATCATGTCAAGCCTCAGCGAGCTCCCCGCCGTCGTACCGAGCTCGAATTG-<br>TAATCATGGTCA                                                                         |
| pUC-AR    | pUC-AR R       | TGACCATGATTACGAATTCGAGCTCGGTACATCCCACACACCTGCCCGTCTGCCTGACA                                                                                      |
| pUC-PSAD  | pUC-PSAD R     | GATTACGAATTCGAGCTCGGTACGTAGGTGAGGACCAGAGCCTACAAC                                                                                                 |
| pUC-METE  | pUC-METE R     | CGAATTCGAGCTCGGTACGACGGCGGGGAGCTCGCTGAGGCTTGACATGATTGGTGCG-<br>TATGTTTG                                                                          |
| AR prom   | pUC-AR F       | GAACGGCGCTGGTCAGCTTGGCCATTTAAGATGTTGAGTGAC                                                                                                       |
| AR prom   | AR-Ble R       | TGACCATGATTACGAATTCGAGCTCGGTACATCCCACACACCTGCCCGTCTGCCTGACA                                                                                      |
| PSAD prom | pUC-PSAD F     | ACTGCTACTCACAACAAGCCCATGGCCAAGCTGACCAGCGCCGTT                                                                                                    |
| PSAD prom | pPSAD-Ble R    | TGACCATGATTACGAATTCGAGCTCGGTACGTAGGTGAGGACCAGAGCCTACAAC                                                                                          |
| METE prom | pUC-METE R     | CAGCTTGGCCATTTTAAGATGTTGAGTGACATGTCACTTAAATAATCGGCCTG                                                                                            |
| METE prom | pMETE-Ble R    | TTGAAGACATAATGGCCAAGCTGACCAGC                                                                                                                    |
| KG0-140   | BleGFP.Fw      | TTGAAGACATCGAACCCTTGACAGCTCGTCCATG                                                                                                               |
| KG0-140   | BleGFP.Rv      |                                                                                                                                                  |

|          |                |                                                           |
|----------|----------------|-----------------------------------------------------------|
| pKG0-472 | THI43U.Fw.gg   | TTGAAGACATGCTTGCGCGCTCAGAACC                              |
| pKG0-472 | THI43U.Rv.gg   | TTGAAGACATAGCGTCTCAACTCCAAATTGTTACATGAG                   |
| pKG0-576 | NIT13U.Fw.gg   | TTGAAGACATGCTTATCGCTAGAGATTGTGGC                          |
| pKG0-576 | NIT13U.Rv.gg   | TTGAAGACATAGCGCGCTTGCTTAATTTACAACCTG                      |
| pKG0-577 | METE3U.Fw.gg   | TTGAAGACATGCTTGCTGCCTGCCTTGATTTATG                        |
| pKG0-577 | METE3U.mBpi.gg | TTGAAGACATTgTTCTGTGCGATGAGTTCAAGG                         |
| pKG0-577 | METE3UmBpiFw2  | TTGAAGACATAAaACCGTATATGAGCTGGTGGCCTGTAGGGTAGCAAGGTGTGACGT |
| pKG0-577 | METE3UmBpiRv2  | TTGAAGACATAGCGACGTACACCTTGCTACCCTACAGGCCACCAGCTCATATACGGT |

Table S2. List of plasmids generated by Gibson assembly.

| Plasmid | Terminator tested | Description                  | Figure  |
|---------|-------------------|------------------------------|---------|
| pMS3-0  | -                 | <i>pAR::Ble-GFP</i>          | 3, 4, 5 |
| pMS3-8  | <i>RPL31</i>      | <i>pAR::Ble-GFP::tRPL31</i>  | 3       |
| pMS3-1  | <i>RPS29</i>      | <i>pAR::Ble-GFP::tRPL29</i>  | 3, 4    |
| pMS3-3  | <i>RPL11</i>      | <i>pAR::Ble-GFP::tRPL11</i>  | 3       |
| pMS3-14 | <i>RBCS2</i>      | <i>pAR::Ble-GFP::tRBCS2</i>  | 3       |
| pMS3-6  | <i>PSAD</i>       | <i>pAR::Ble-GFP::tPSAD</i>   | 3, 4, 5 |
| pMS3-11 | <i>THI4</i>       | <i>pAR::Ble-GFP::tTHI4</i>   | 3       |
| pMS3-10 | <i>METE</i>       | <i>pAR::Ble-GFP::tMETE</i>   | 3       |
| pMS3-12 | <i>CA1</i>        | <i>pAR::Ble-GFP::tCA1</i>    | 3, 4, 5 |
| pMS3-13 | <i>NIT1</i>       | <i>pAR::Ble-GFP::tNIT1</i>   | 3       |
| pMS3-N  | <i>PSAD</i>       | <i>pPSAD::Ble-GFP::tPSAD</i> | 5       |
| pMS3-K  | <i>CA1</i>        | <i>pPSAD::Ble-GFP::tPSAD</i> | 5       |
| pMS3-O  | <i>PSAD</i>       | <i>pMETE::Ble-GFP::tPSAD</i> | 5       |
| pMS3-L  | <i>CA1</i>        | <i>pMETE::Ble-GFP::tPSAD</i> | 5       |

Table S3. MoClo constructs employed and generated. The level 2 plasmids were used to generate data for Figure 6.

| Plasmid    | Description                                                         | Function                            | Level | Source          |
|------------|---------------------------------------------------------------------|-------------------------------------|-------|-----------------|
| pCM0-010   | <i>pPSAD (Pro + 5'UTR)</i>                                          | Promoter + 5'UTR                    | 0     | [1]             |
| pCM0-011   | <i>pAR (Pro + 5'UTR)</i>                                            | Promoter + 5'UTR                    | 0     | [1]             |
| pPM0-024   | <i>RBCS2i1 (5'UTR)</i>                                              | RBCS2 intron 1 as 5'UTR enhancer    | 0     | This study      |
| pKG0-140   | <i>BleGFP (CDS)</i>                                                 | Resistance to zeocin + Reporter GFP | 0     | This study      |
| pCM0-098   | <i>HA (C-ter tag, CDS)</i>                                          | Immuno- and purification tag        | 0     | [1]             |
| pCM0-074   | <i>AphVIII (CDS)</i>                                                | Resistance to paromomycin           | 0     | [1]             |
| pCM0-116   | <i>RSP29 (3'UTR + Ter)</i>                                          | 3'UTR and Terminator                | 0     | This study, [1] |
| pCM0-114   | <i>PSAD (3'UTR + Ter)</i>                                           | 3'UTR and Terminator                | 0     | [1]             |
| pCM0-117   | <i>CA1 (3'UTR + Ter)</i>                                            | 3'UTR and Terminator                | 0     | This study, [1] |
| pKG0-472   | <i>THI4 (3'UTR + Ter)</i>                                           | 3'UTR and Terminator                | 0     | This study      |
| pKG0-576   | <i>NIT1 (3'UTR + Ter)</i>                                           | 3'UTR and Terminator                | 0     | This study      |
| pKG0-577   | <i>METE (3'UTR + Ter)</i>                                           | 3'UTR and Terminator                | 0     | This study      |
| pFL_L1_004 | <i>pPSAD::RBCS2i1::BleGFP::tRPS29</i>                               | Expression cassette                 | 1     | This study      |
| pFL_L1_005 | <i>pPSAD::RBCS2i1::BleGFP::tPSAD</i>                                | Expression cassette                 | 1     | This study      |
| pFL_L1_006 | <i>pPSAD::RBCS2i1::BleGFP::tCA1</i>                                 | Expression cassette                 | 1     | This study      |
| pFL_L1_011 | <i>pAR::RBCS2i1::AphVIII::tPSAD</i>                                 | Expression cassette                 | 1     | This study      |
| pFL_L2_038 | <i>pPSAD::RBCS2i1::BleGFP::tRPS29::pAR::RBCS2i1::AphVIII::tPSAD</i> | Expression cassette                 | 2     | This study      |
| pFL_L2_044 | <i>pPSAD::RBCS2i1::BleGFP::tPSAD::pAR::RBCS2i1::AphVIII::tPSAD</i>  | Expression cassette                 | 2     | This study      |
| pFL_L2_050 | <i>pPSAD::RBCS2i1::BleGFP::tCA1::pAR::RBCS2i1::AphVIII::tPSAD</i>   | Expression cassette                 | 2     | This study      |

*pAR::RBCS2i1::AphVIII::tPSAD*

**Table S4.** Expression ranking of *C. reinhardtii* genes used in this study. The expression rank over the diurnal cycle was determined by comparing the mean FPKM values in the dark, in the light and over the diurnal cycle. Data obtained from Strenkert *et al.* [2] (Dataset S2). The mean FPKM values (Mean), standard deviation (SD) and the expression rankings (Rank) are listed.

| Gene ID       | Name         | Expression in the dark <sup>1</sup> |        |       | Expression in the light <sup>2</sup> |         |       | Expression diurnal cycle <sup>3</sup> |         |       |
|---------------|--------------|-------------------------------------|--------|-------|--------------------------------------|---------|-------|---------------------------------------|---------|-------|
|               |              | Mean                                | SD     | Rank  | Mean                                 | SD      | Rank  | Mean                                  | SD      | Rank  |
| Cre12.g489153 | <i>L31</i>   | 2023.91                             | 176.15 | 40    | 2571.08                              | 903.89  | 45    | 2425.76                               | 803.35  | 42    |
| Cre08.g358556 | <i>RPS29</i> | 1312.28                             | 125.52 | 82    | 1663.83                              | 599.01  | 84    | 1597.48                               | 563.75  | 79    |
| Cre01.g027000 | <i>RPL11</i> | 1578.22                             | 131.49 | 61    | 1946.29                              | 693.82  | 68    | 1889.14                               | 651.09  | 63    |
| Cre02.g120150 | <i>RBCS2</i> | 5281.06                             | 713.44 | 13    | 8078.13                              | 2585.11 | 15    | 7054.93                               | 2384.99 | 12    |
| Cre05.g238332 | <i>PSAD</i>  | 974.70                              | 349.65 | 116   | 2425.35                              | 1012.79 | 51    | 1577.50                               | 942.19  | 80    |
| Cre04.g214150 | <i>THI4</i>  | 463.50                              | 157.47 | 188   | 736.43                               | 520.54  | 179   | 522.81                                | 375.75  | 194   |
| Cre03.g180750 | <i>METE</i>  | 39.82                               | 90.98  | 812   | 396.42                               | 176.57  | 232   | 173.57                                | 214.41  | 345   |
| Cre04.g223100 | <i>CA1</i>   | 42.56                               | 44.69  | 771   | 417.34                               | 343.95  | 225   | 217.22                                | 268.27  | 300   |
| Cre09.g410950 | <i>NIT1</i>  | 0.14                                | 0.14   | 14971 | 0.13                                 | 0.04    | 15373 | 0.13                                  | 0.05    | 15537 |

<sup>1</sup> For expression in the dark, FPKM values from timepoints -11,-9,-7,-5,-3,-1h were used.

<sup>2</sup> For expression in the light, FPKM values from timepoints 1,3,5,7,9,11h were used.

<sup>3</sup> For expression over the diurnal cycle FPKM values from all timepoints were used.

## References

1. Crozet, P.; Navarro, F.J.; Willmund, F.; Mehrshahi, P.; Bakowski, K.; Lauersen, K.J.; Pérez-Pérez, M.-E.; Auroy, P.; Gorchs Rovira, A.; Sauret-Gueto, S.; et al. Birth of a Photosynthetic Chassis: A MoClo Toolkit Enabling Synthetic Biology in the Microalga *Chlamydomonas reinhardtii*. *ACS Synth. Biol.* **2018**, *7*, 2074–2086, doi:10.1021/acssynbio.8b00251.
2. Strenkert, D.; Schmollinger, S.; Gallaher, S.D.; Salomé, P.A.; Purvine, S.O.; Nicora, C.D.; Mettler-Altmann, T.; Soubeyrand, E.; Weber, A.P.M.; Lipton, M.S.; et al. Multiomics resolution of molecular events during a day in the life of *Chlamydomonas*. *Proc. Natl. Acad. Sci. U. S. A.* **2019**, *116*, 2374–2383, doi:10.1073/pnas.1815238116.
